# Supplementary figures and images for: Differential Expression of RAD51AP1 in Ovarian Cancer: Effects of siRNA In Vitro
Source: MDPI journal article supplement (doi:10.3390/jpm12020201), 2022-02-01

### Supplementary Figure S2

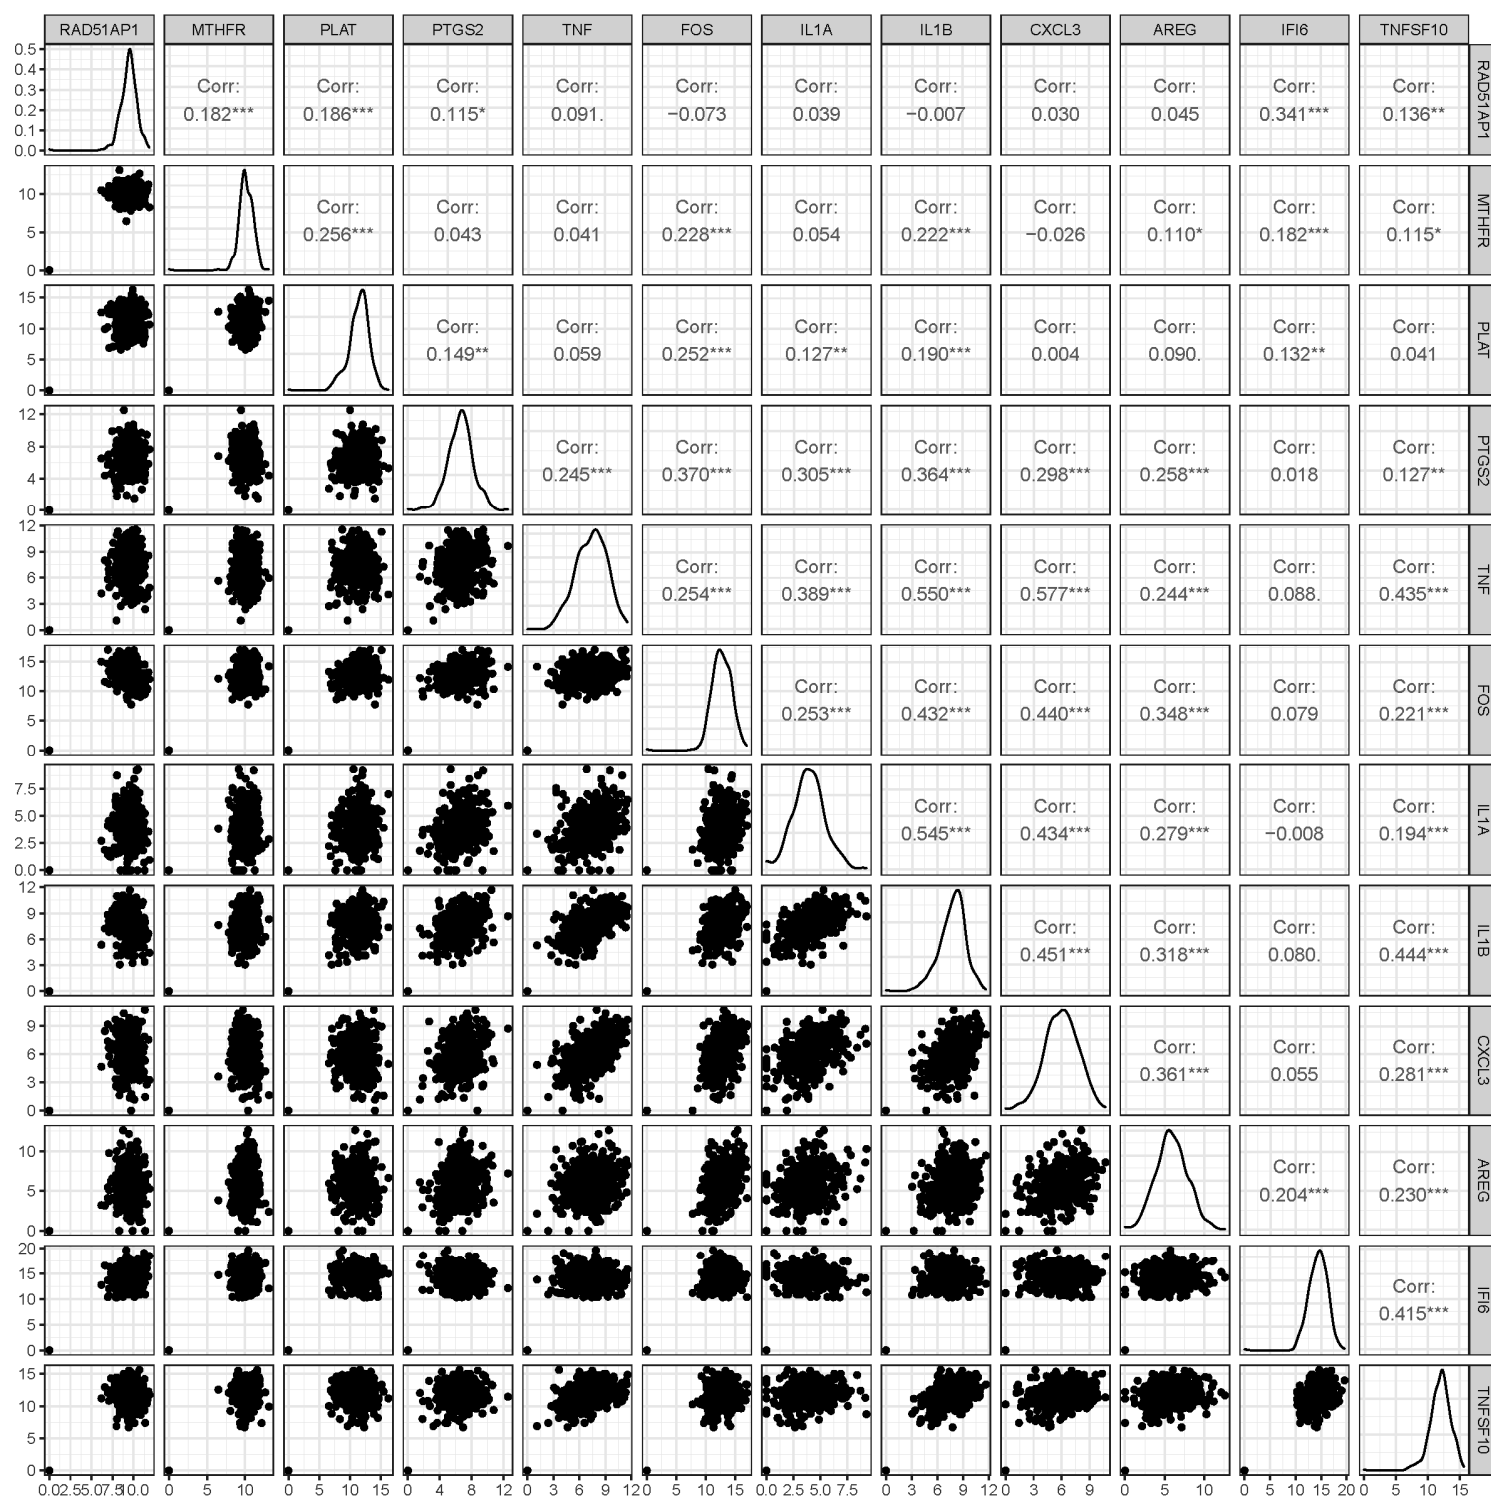

Supplement: s1 [file s1]

Supplementary Figure S1

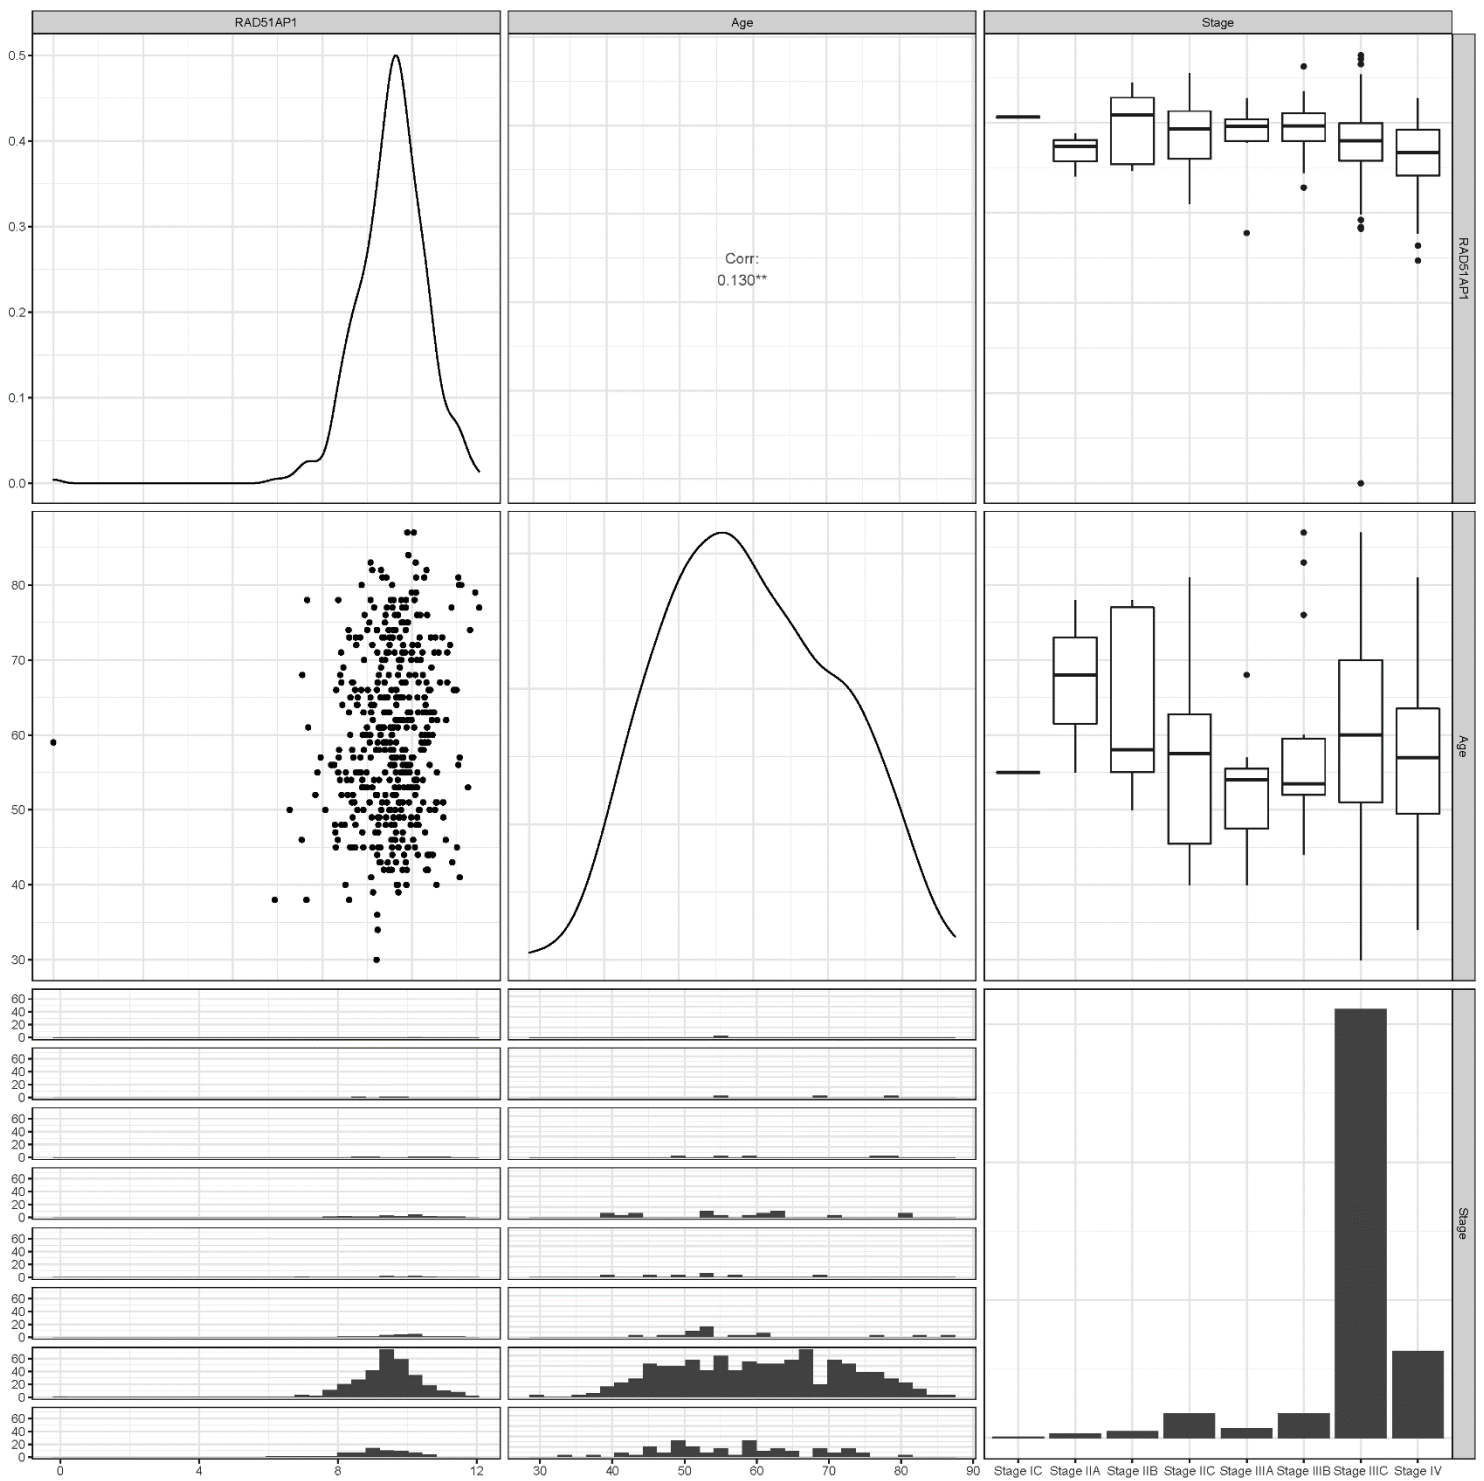

Supplement: s1 [file s1]
